# Supplementary material for: Development and testing of a novel sulfur dioxide sonde
Source: Copernicus journal article supplement (doi:10.5194/amt-15-4373-2022), 2022-07-29
Supplement: Supplementary file 1 [file amt-15-4373-2022-supplement.pdf]

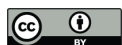

*Supplement of*

## **Development and testing of a novel sulfur dioxide sonde**

**Subin Yoon et al.**

*Correspondence to:* James H. Flynn (jhflynn@central.uh.edu)

The copyright of individual parts of the supplement might differ from the article licence.

1 **Supplementary Data**

2 **Table S1: Results of lower limit of detection calculation (LLOD,  $3\sigma$ ) at various altitudes (via density correction**  
 3 **calculation) from laboratory testing of SO<sub>2</sub> sonde with a 0.25  $\mu$ A biased current using dry zero air.**

| Altitude, km | 0.25 $\mu$ A    |                  |             |
|--------------|-----------------|------------------|-------------|
|              | LLOD, 1s (ppbv) | LLOD, 20s (ppbv) | ULOD (ppbv) |
| 0            | 0.21            | 0.17             | 12          |
| 5            | 0.35            | 0.28             | 19          |
| 10           | 0.62            | 0.50             | 35          |
| 15           | 1.32            | 1.07             | 74          |
| 20           | 2.89            | 2.35             | 163         |
| 25           | 6.46            | 5.25             | 363         |
| 30           | 14.10           | 11.50            | 796         |

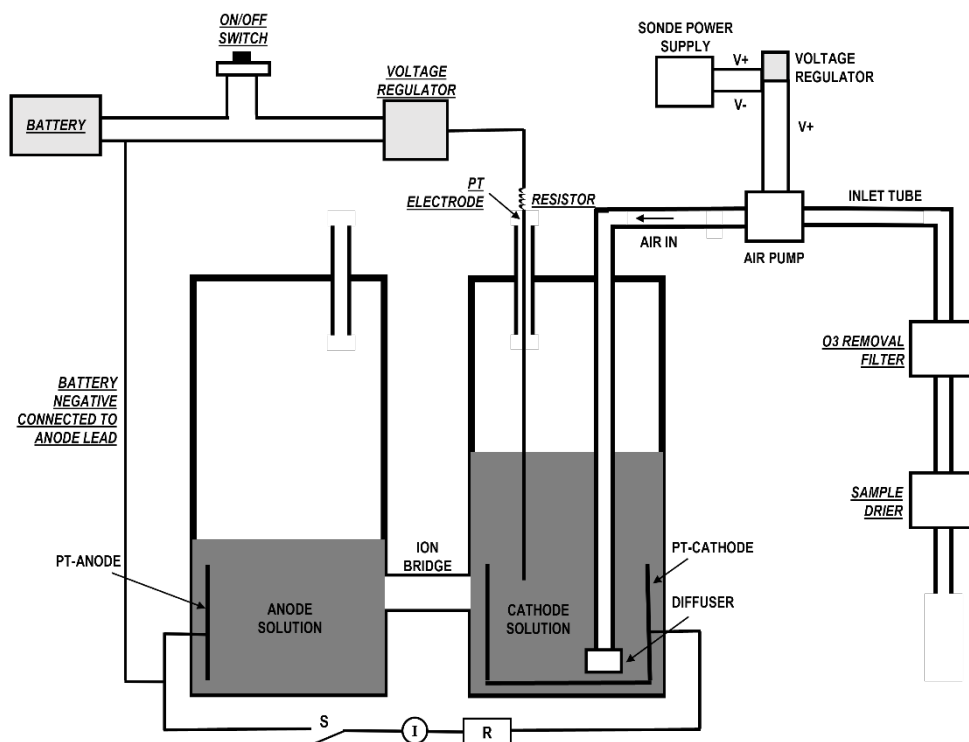

6  
 7 **Figure S1: Schematic of the electronic concentration cell (ECC) for the SO<sub>2</sub> sonde. All italicized and underlined labels**  
 8 **are items that were added to the traditional ECC for the SO<sub>2</sub> sonde.<sup>1</sup>**  
 9

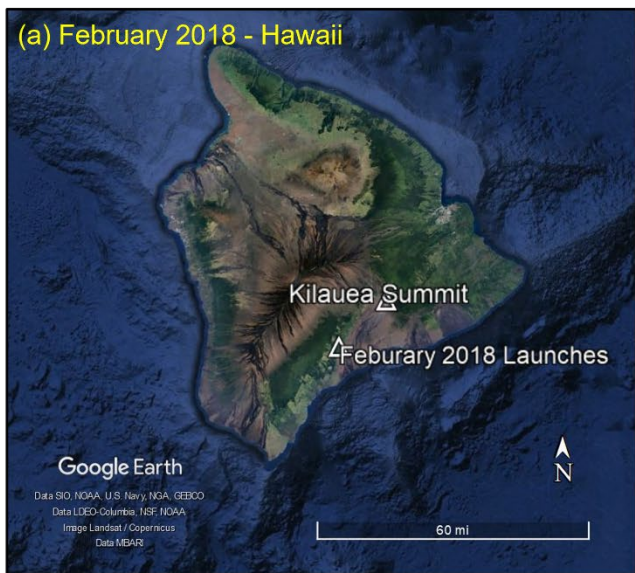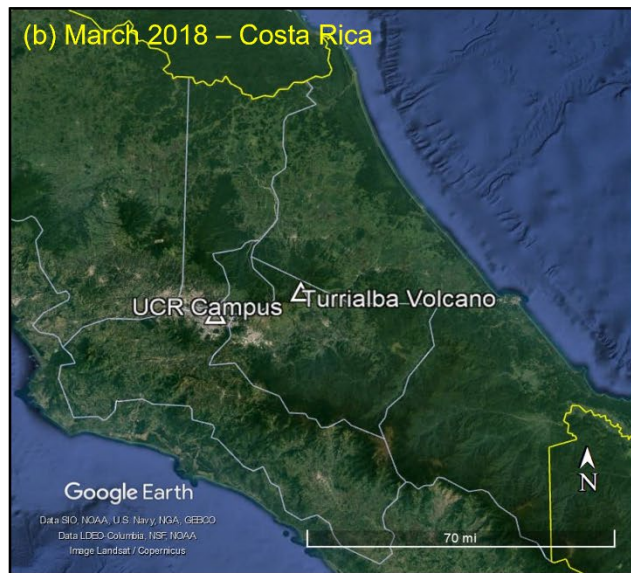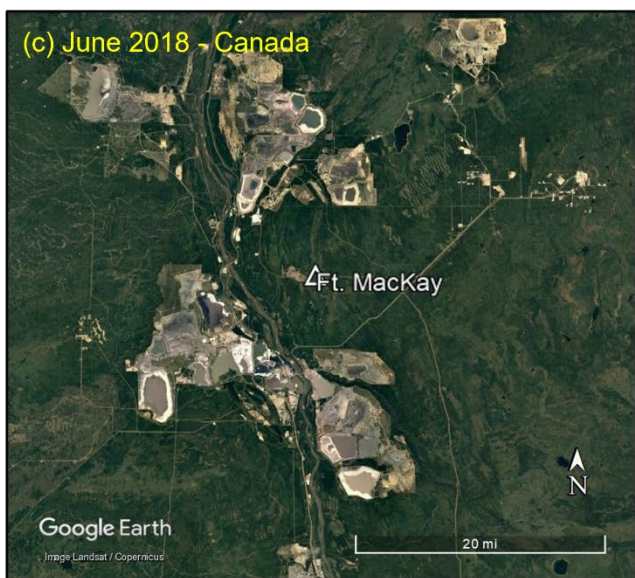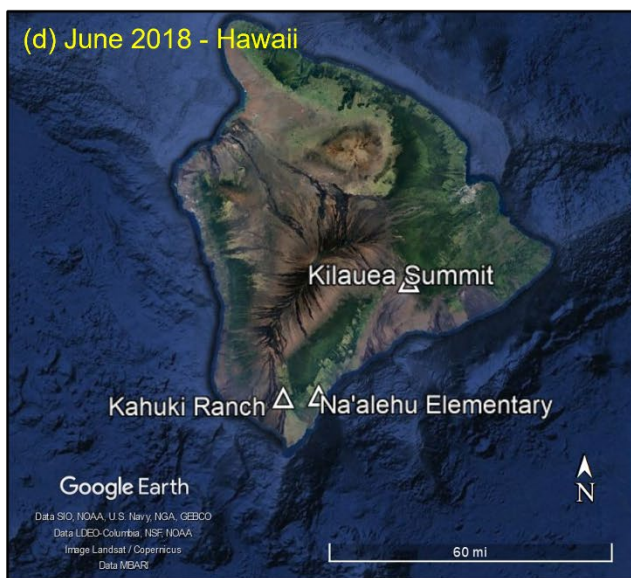

10

11 **Figure S2: Field sites of SO<sub>2</sub> sonde launches (a) in Hawai'i during the H3C from February 3-10, 2018; (b) in Costa Rica**  
 12 **on March 23, 2018; (c) in the Athabasca Oil Sands from June 10-16, 2018; and (d) in Hawai'i during BISOS in June**  
 13 **2018. Maps are from Google Earth.**

14

15 <sup>1</sup> Flynn, J. and Morris, G. A.: A method for directly measuring SO<sub>2</sub> and other trace gases by electrochemical cell (ECC) sonde,  
 16 United States Patent 11,150,217, 2021.

17
